# Supplementary material
Source: Elsevier journal article supplement (https://www.sciencedirect.com/science/article/pii/S1885585717303900)
Supplement: mmc1 [file mmc1.pdf]

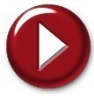

**Supplementary material**

**Single Nucleotide Variants Associated With Polygenic Hypercholesterolemia  
in Families Diagnosed Clinically With Familial Hypercholesterolemia**

**Table 1 of the supplementary material**

Allele Frequency of Genetic Variants in NFHGH Blood Family Members Comparing Participants with LDL-C < 90th Percentile and Participants with LDL-C ≥ 90th Percentile.

| Gene         | SNV       | Nucleotide change             | Risk allele | Allelic risk frequency                        |                                               | P     |
|--------------|-----------|-------------------------------|-------------|-----------------------------------------------|-----------------------------------------------|-------|
|              |           |                               |             | LDL-C ≥ 90 <sup>th</sup> percentile (n = 129) | LDL-C < 90 <sup>th</sup> percentile (n = 139) |       |
| <i>SORT1</i> | rs629301  | c.*1635G>T                    | T           | 0.833                                         | 0.828                                         | .876  |
| <i>APOB</i>  | rs1367117 | c.293G>A                      | A           | 0.323                                         | 0.316                                         | .870  |
| <i>ABCG8</i> | rs6544713 | c.322+431T>C                  | C           | 0.405                                         | 0.371                                         | .418  |
| <i>LDLR</i>  | rs6511720 | c.321+711 G>T                 | G           | 0.855                                         | 0.815                                         | .212  |
| <i>APOE</i>  | rs429358  | c.388T>C                      | C           | 0.136                                         | 0.137                                         | .9912 |
|              | rs7412    | c.526C>T                      | C           | 0.035                                         | 0.061                                         | .157  |
| Gene score   |           | Median cholesterol gene score |             |                                               | P                                             |       |

|  |                                                       |                                                  |      |
|--|-------------------------------------------------------|--------------------------------------------------|------|
|  | LDL-C $\geq$ 90 <sup>th</sup> percentile<br>(N = 129) | LDL-C < 90 <sup>th</sup> percentile<br>(N = 139) |      |
|  | 40.2                                                  | 37.4                                             | .048 |

A, adenine; C, cytosine; G, guanine; LDL-C, low-density lipoprotein cholesterol; NFHGH, nonfamilial hypercholesterolemia genetic hypercholesterolemia; SNV, single nucleotide variant; T, thymine.

The *P* value was calculated by the Mann-Whitney *U* or chi-square tests, by comparing mutant vs wild-type allelic frequencies, as appropriate.

**Table 2 of the supplementary material**

Linear Regression Analysis of Clinical, Biochemical and Single Nucleotide Variants with Low-density Lipoprotein Concentration in NFHGH Blood Family Members

| Variable               | B Coefficient | 95%CI             | <i>P</i> | Corrected R <sup>2</sup> |
|------------------------|---------------|-------------------|----------|--------------------------|
| Age                    | 0.544         | 1.434-2.259       | < .001   | 0.278                    |
| Waist circumference    | -0.282        | -2.169 to -0.385  | .005     |                          |
| <i>APOE</i> (c.526C>T) | -0.131        | -42.451 to -4.602 | .015     |                          |
| <i>APOB</i> (c.293G>A) | 0.106         | 0.086-17.610      | .048     |                          |

95%CI, 95% confidence interval, NFHGH, nonfamilial hypercholesterolemia genetic hypercholesterolemia.

Linear regression model adjusted for body mass index, age, sex, and waist circumference.
